# Supplementary material
Source: publisher figshare collection journal article supplement (https://tandf.figshare.com/ndownloader/files/14132123)

**Supplementary Figure 1.** Superposed structure of complexes LdP-Lig1 (red), LdP-Lig2 (blue) and LdP-EWSI (green).


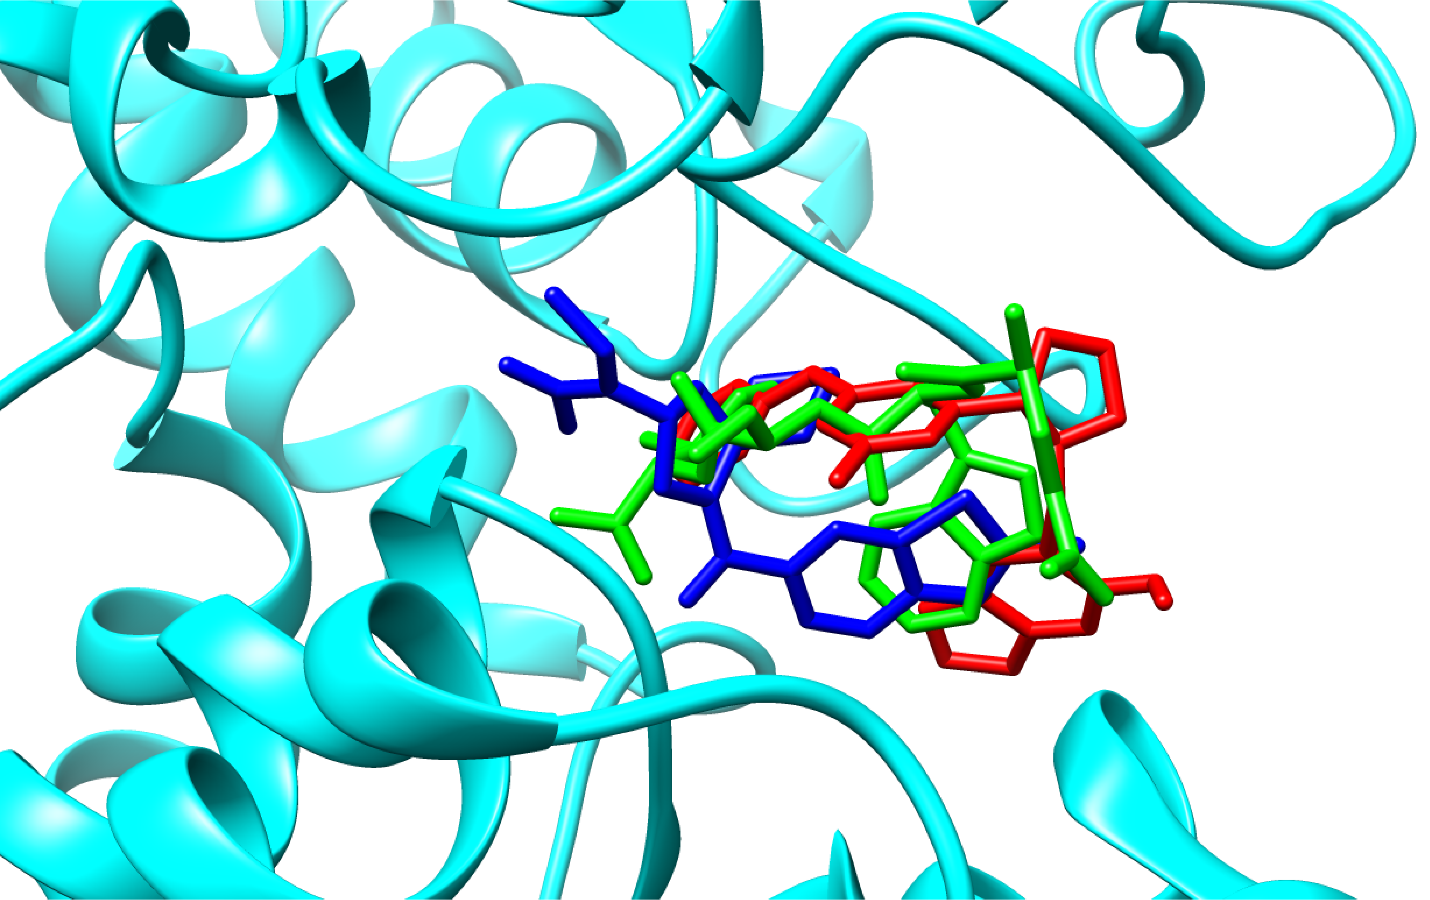


**Supplementary Figure 2.** Superposed structures of LdP-Lig1 and LdP-Lig2 before and after simulation.


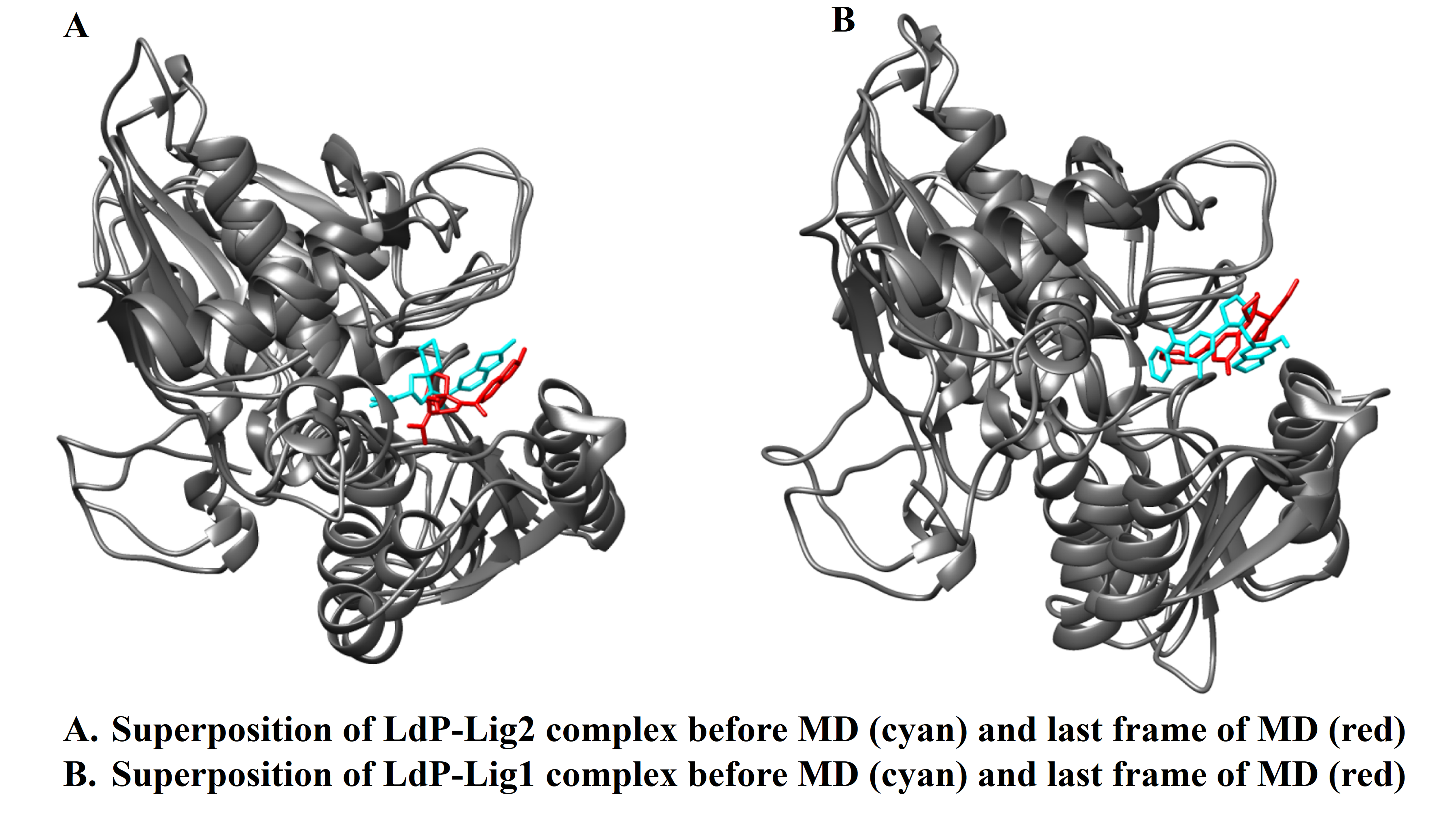


**Supplementary Figure 3.** Interaction of different peptides with Mycobacterium OASS.


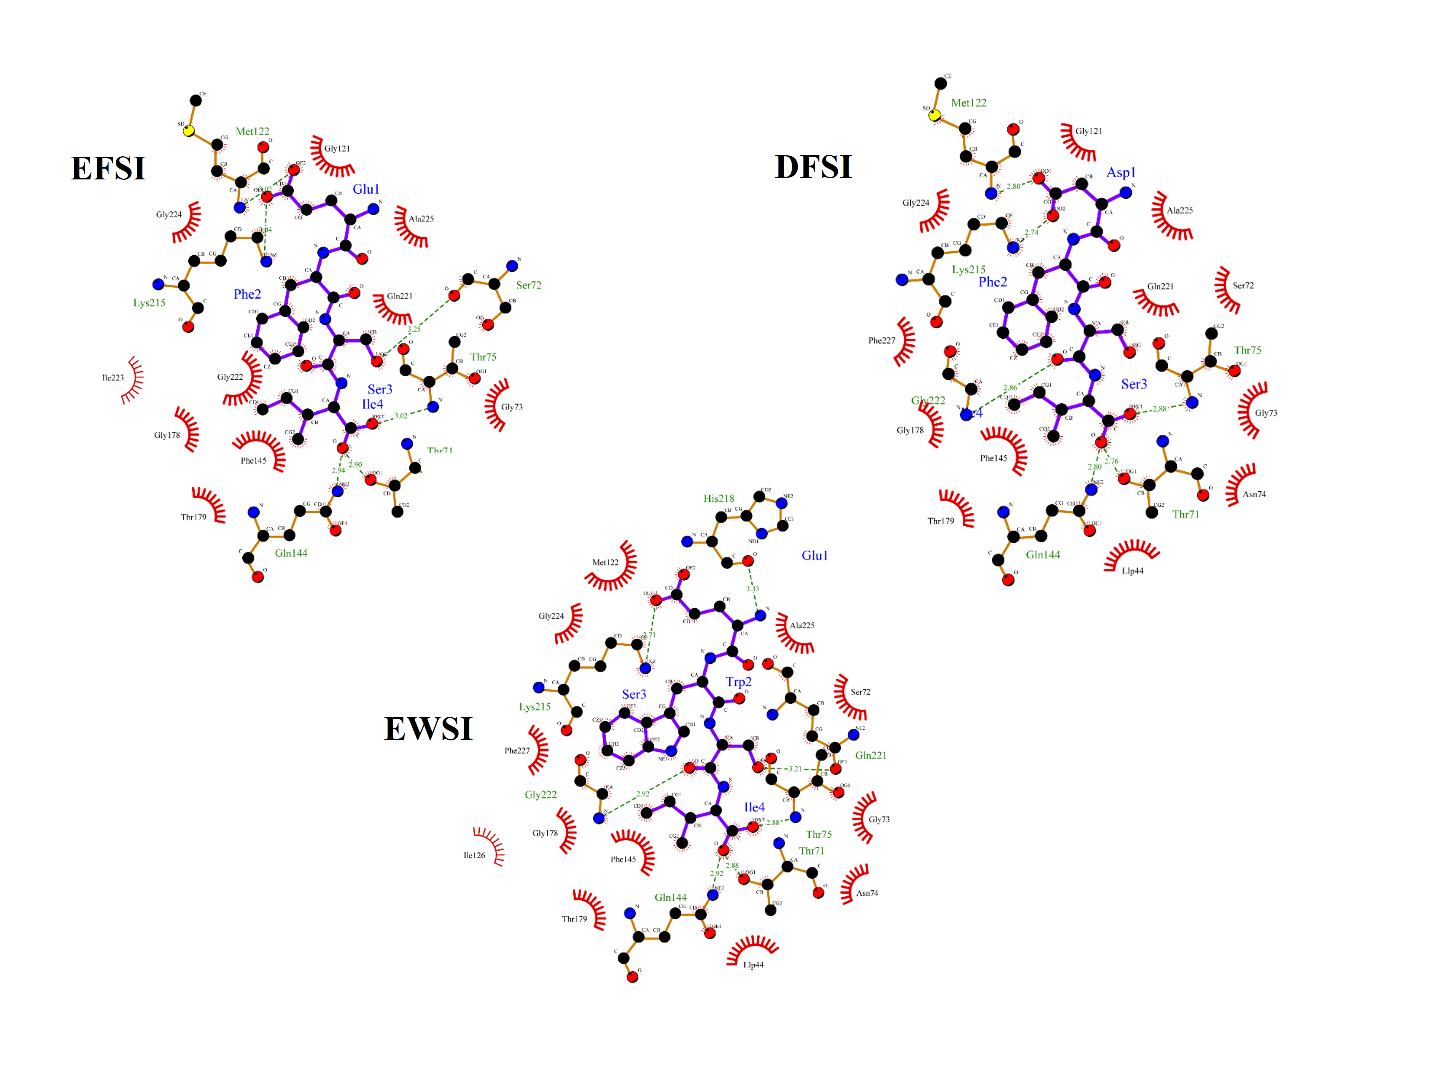

Supplement: Supplementary file 1 [file 14132123]
